Negative correlation between the expression of *tlr4* and *grp78* is characteristic of sepsis onset and progression

Authors: Razvan C. Stan<sup>1</sup>, Camila P. Bonin<sup>1</sup>, Rose Porto<sup>2</sup>, Francisco G. Soriano<sup>2,3</sup>, Maristela M. de Camargo<sup>1\*</sup>

<sup>1</sup>Laboratory of Molecular Immunoregulation, Institute of Biomedical Sciences, University of São Paulo, CEP 05508-900, São Paulo, Brazil

<sup>2</sup>University Hospital, University of São Paulo, CEP 05508-000, São Paulo, Brazil

<sup>3</sup>School of Medicine, University of São Paulo, CEP 01246-904, São Paulo, Brazil

\* Corresponding author: [mmcamar@usp.br](mailto:mmcamar@usp.br) (M.M.D.C.)

## Abstract

In sepsis caused by Gram-negative bacteria, modulation of Toll-like receptor 4 (TLR4) activity by modulators such as glucose-regulated protein 78 kDa (GRP78), is believed to shift the equilibrium between pro- and anti-inflammatory downstream signaling cascade. We measured daily mRNA *tlr4* and *grp78* expression levels in peripheral blood of a cohort of septic patients, upon intensive care admission, and modeled these mRNA values based on a sine damping function. We obtained negative correlations between *tlr4* and *grp78* mRNA in the survivor group. In contrast, such relation is lost in the deceased patients. Effect sizes were 2.035 (*tlr4*) and 2.168 (*grp78*). Measuring the correlation patterns of the expression of these two genes may serve as a robust means to gauge sepsis progression, requiring three points of measurement on the first day of hospitalization. Higher levels of *grp78* and lower levels of *tlr4* anticipated a positive evolution of sepsis, resulting in patient survival.

# Introduction

Sepsis syndrome is a major public health concern that involves both the physiological and pathological reactions of the organism to invading pathogens and their toxins. The Sepsis-related Organ Failure Assessment (SOFA) uses at least two of the following clinical criteria for its diagnosis: respiratory rate  $\geq 22$  bpm, altered mentation, or systolic blood pressure  $\leq 100$  mm Hg [1]. As the condition worsens, sepsis leads to at least one organ dysfunction, and further develops into septic shock characterized by hypotension unresponsive to fluid therapy. This latter stage is associated with high morbidity and mortality rates [2].

Toll-family members link innate and adaptive immunity [3]. TLR4 senses lipopolysaccharides (LPS) from Gram-negative bacteria but also endogenous ligands from the host (eg. fibrinogen) [4] [5]. The signaling cascade thus initiated, and the ultimate mounting of the immune response, requires the involvement of the unfolded protein response (UPR) to ensure overall quality control of multiple proteins needed to be synthesized, folded, and secreted. Exposure to low doses of LPS inhibits the endoplasmic reticulum (ER)-stress response in macrophages and activates the inositol-requiring enzyme 1 (IRE1) -- X-box binding protein 1 (XBP1) pathway that augments the initial production of pro-inflammatory cytokines [6]. However, continued LPS stimulation ultimately induces the apoptosis of immune cells, an important pathological alteration observed during sepsis [7]. For instance, abnormal myocardial and lymphocytic apoptosis are associated with an exacerbation of the UPR and are observed in later sepsis stages. This includes an initial upregulation of the anti-apoptotic glucose-regulated protein 78 kDa (GRP78) [8], followed by increased levels of the pro-apoptotic C/EBP homologous protein (CHOP) [9-11]. Consequently, attenuation of ER stress with pharmacological agents reduces the

overall amplitude of inflammation, as do the anti-apoptotic therapies that rescue experimental models from peritoneal and respiratory sepsis [12].

A multitude of sepsis biomarkers have been put forth as their early detection implicate, among others, complement activation, inflammation, and coagulation [13]. Whereas the early sepsis stage associated with the pro-inflammatory signaling cascade is generally reversible, patients that progress into septic shock are more likely to succumb, despite therapy [14]. Consequently, as the response to sepsis varies over time, the period during which any specific biomarker is useful will change accordingly, complicating its reliability [15]. The early involvement of surface TLR4 in mediating systemic responses to both invading pathogens and endogenous ligands, and the requirement of proper UPR for ensuring folding of immunity-related proteins such as cytokines, make these elements essential for sepsis pathogenesis [16], and as such they may serve as sepsis biomarkers.

Our goal was to make use of daily sampling of *tlr4* and *grp78* mRNA levels in septic human patients in order to determine whether their temporal coincidence is a necessary condition for an appropriate response to pathogen. Using clinical and experimental data, we present a mathematical model that reflects the interdependence between the *tlr4* and *grp78* transcription levels. We aimed to relate the asynchrony we obtained from fitting the data to a damped harmonic oscillation, to the patient outcome. Given the importance of GRP78 in modulating the initial response to endotoxins through the control of cytokine production, variations in its expression may be used as an early biomarker for the evaluation of sepsis progression.

# Results and Discussion

In order to evaluate whether accumulation of transcripts of *tlr4* and *grp78* were synchronous over the course of sepsis, we collected samples of peripheral blood every 24 hours (unless noted otherwise) of sepsis adult patients. An inclusion criterion was that first sample (day 0) was collected as soon as the patient was admitted at the Intensive Care Unit (ICU), and before treatment was initiated. Our exclusion criteria narrowed our cohort down to only 10 patients that were not previously treated for infectious or inflammatory conditions prior to admittance at the ICU. For details on patient recruitment and inclusion/exclusion criteria, refer to Material and Methods section. Samples were collected for up to 5 days, regardless of the clinical outcome of the patient. Although whole peripheral blood provides a mixed leukocyte population, which is insufficiently characterized and may have varied significantly among patients and across time, we opted for such samples since (i) their collection and processing reflect real working conditions of intensive care providers at an ICU setting without a cell separation facility, and (ii) every sample's RNA content was normalized against its own housekeeping gene expression, excluding artifacts of significant variation in RNA content intra- and inter-individuals. Averaged (main panels) and raw (inserts) daily profiles of *tlr4* and *grp78* transcript levels of patients are presented in Figure 1.

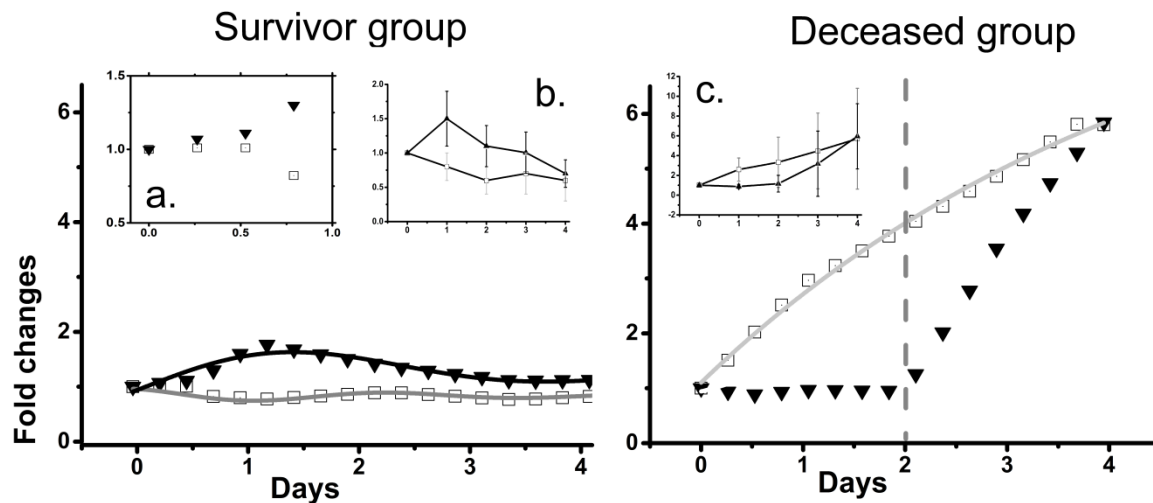

**Figure 1.** Averaged mRNA time-courses during sepsis progression. Experimental data and fitted curves for the survivor group (left panel) and deceased group (right panel). Squares represent *tlr4*, triangles represent *grp78*. Fitted curves for transcripts of the two genes are depicted as a line. For *grp78* transcripts in deceased patients (triangles, right panel), we have considered only the sinusoid part of the curve until the switch point at approximately 48 hours (refer to text for further details). The insert (a.) shows the first 24 hours of averaged data in the survivor group. Inserts (b.) and (c.) show the raw data with standard deviations bars (no interpolation).

In patients who survived sepsis (Fig 1, left panel), the accumulation of transcripts for both *tlr4* and *grp78* presents an initial synchronized increase during the initial 6 hours (see figure insert (a.) for details). This is followed by a marked down-regulation of *tlr4* (square symbols) until 48 hours and by an increase of *grp78* (triangle symbols) that peaks around 24 hours, with subsequent continuous decrease. In deceased patients (Fig 1, right panel), *tlr4* values (square symbols) increase exponentially, while *grp78* (triangle symbols) mRNA from deceased patients oscillate until an exponential increase at a switch point at day 2. Fluctuations in the transcript levels of *tlr4* (survivor group only) and *grp78* (both groups) were simulated using an equation describing an energy dissipating harmonic oscillator:

$$y = y_0 + Ae^{\frac{x}{t_0}} [\sin \pi(x - \phi)/w] \quad (1)$$

Data were fitted to a damped sine wave by varying the following parameters:  $y_0$  = offset,  $A$  = initial amplitude,  $t_0$  = decay constant,  $\phi$  = phase shift and  $w$  = period, as shown in Table 1.

**Table 1** Fitted values to the curves describing the *tlr4* and *grp78* changes in transcripts

|           | Transcript | $\phi$ (radian) | A (fold changes) | $t_0$ (fold changes/day) | w (radian/day)  |
|-----------|------------|-----------------|------------------|--------------------------|-----------------|
| Survivors | TLR4       | $-0.67 \pm 0.1$ | $0.12 \pm 0.02$  | $3.1 \pm 0.9$            | $1.2 \pm 0.05$  |
|           | GRP78      | $0.6 \pm 0.06$  | $0.45 \pm 0.07$  | $4.5 \pm 0.8$            | $1.9 \pm 0.12$  |
| Deceased  | GRP78      | $-0.6 \pm 0.1$  | $0.08 \pm 0.02$  | $0.97 \pm 0.4$           | $0.76 \pm 0.07$ |

The average *tlr4* mRNA values of deceased patients were fitted to the following asymptotic exponential equation:

$$y = a - bc^x \quad (2)$$

with fitting parameters asymptote ( $9.2 \pm 0.8$ ), response range ( $8.1 \pm 0.7$ ), and c rate of change ( $0.84 \pm 0.03$ ).

Previous measurements of *tlr4* mRNA production in murine macrophages yielded a high peak around 20 hours post-stimulation, followed by a smaller peak around the 40 hours mark [17]. While the first peak is absent in the *tlr4* transcript variations of our discharged patients group, the second peak is recovered, as evidenced through the w-parameter. The increase of *tlr4* transcripts on the second day upon ICU admission may signal the presence of a regulatory mechanism that limits the initial amount of available TLR4 so as to dampen the subsequent inflammation stage. In contrast, in the deceased group, loss of regulation appears to lead to an exponential increase in the production of *tlr4* mRNA with lethal effects for the patients' outcome. As endotoxin concentration increases the initial production and the subsequent half-life of *tlr4* mRNA [18], we hypothesize that a more robust and physiological response to the septic challenge may also require a rapid regulation to the subsequent increase in TLR4 expression and activity, chiefly through controlled transcription of *tlr4* and increased transcription of its different modulators, including GRP78.

We observed the opposite trend for the transcripts of *grp78*, reflecting its role as an important TLR4 regulator: in deceased patients, within the first 48 hours (to which data could be fitted), the amplitude and decay constants are lower than those found in the survival group, reflecting lower levels of *grp78* expression in deceased patients when compared to patients that survived. The exponential increase in *grp78* transcripts past this point in the deceased group may relate to the findings of higher levels of extracellular isoforms of the heat shock protein-70 kDa (Hsp70) family, including GRP78 [19], that are implicated in the progression to septic shock, in the subsequent immunosuppression phase of sepsis [20], and are found in the serum of septic patients [21]. It is possible that the oxidative stress caused by engagement of TLR4 and cytokine receptors may contribute to the modulation of serum Hsp70 levels, by causing its active secretion [22], or release through necrosis [23]. Furthermore, cell-membrane localized GRP78 assist in recruiting oxidized phospholipids that promote both endothelial barrier integrity against refractory hypotension [24] and rescue from TLR4-based acute inflammation [25]. While extracellular Hsp70 act as an agonist to TLR4, intracellular members of Hsp70 family markedly inhibit not only signaling downstream of TLR4, but also modulate its ubiquitination and proteasomal degradation [26].

Recognition of pathogens and subsequent activation of inflammatory signaling was proposed to be regulated by a "macrophage-intrinsic clock", affecting TLR4 circadian activity regulation through in-phase gene transcription of downstream modulators radio-protective 105 (RP105) and myeloid differentiation factor-1 (MD1), along with GRP78 itself [27]. Within the survivor group, we measured an inverse relation between the higher amplitude of *grp78* transcripts accumulation with respect to *tlr4*, and comparatively similar decay rates. Furthermore, the phase delay for *tlr4* transcription succeeded the corresponding transcription of *grp78* in discharged

1 patients, with the inverse trend observed in the group of deceased patients. Other important TLR4  
2 modulators, including MD2 and Myeloid differentiation primary response gene 88 (MyD88), are  
3 also upregulated upon LPS stimulation of human monocytes and macrophages [18]. Moreover,  
4 dysregulation of central and peripheral circadian rhythms was noted in studies of septic patients in  
5 ICU, and complete loss thereof was characteristic of non-survivors [28]. The mutual relationship  
6 between the expression of *tlr4* and *grp78* may occur by means of a common regulatory mechanism  
7 involving interleukin-10 (IL-10). IL-10 signaling in unstressed cells blocks *grp78* transcription by  
8 inhibiting nuclear translocation of transcription factor ATF-6 and its binding to *grp78* promoter  
9 [29]. IL-10 upregulates the expression of TLR4, MyD88 and CD14 [30]. Upon LPS treatment, IL-  
10 10 mRNA expression has a very slow onset and is not detected in culture before a 6 hours mark,  
11 increasing steadily to 24 hours after stimulation [31]. Both IL-10 mRNA and protein responses are  
12 slow to occur in human monocytes [32] and microglial cells [33]. It is possible that this delayed  
13 response may contribute to the initial *grp78* upregulation that we observed in the survivors group.  
14 As IL-10 progressively accumulates up to 48 hours [31], the *tlr4* expression may become  
15 dominant. However, increasing IL-10 levels upon TLR4 signaling also inhibits the induction of  
16 the microRNA miR-155, that results in higher concentrations of Src homology 2 (SH2) domain-  
17 containing inositol-5'-phosphatase 1 (SHIP1), culminating with further inhibition of TLR4 own  
18 signaling [34]. IL-10 is an anti-inflammatory modulator responsible for the dampening of the  
19 initial pro-inflammatory response through autocrine/paracrine feedback mechanisms. As such,  
20 TLR4-mediated IL-10 induction may be subject to intrinsic temporal regulation that delays IL-10  
21 production to allow time for the initiation of the immune response upon LPS stimulation [35]. The  
22 combination of positive and negative regulatory loops involving IL-10 may be responsible for the  
23 oscillatory expression patterns we measured in our cohort. Constructing gene expression profiles



for key modulators of the sepsis syndrome represents a novel and non-invasive means to assess its evolution. Such gene expression profiles of mediators have been previously described for other pathological conditions, as coronary artery disease [36] and, using TLR7 and TLR8, for acute ischemic stroke [37]. Taken together, our observations and those of others [14] may reflect the requirement for TLR4 modulators to be timely expressed before the necessary TLR4 upregulation, in order to prevent subsequent excessive pro-inflammatory signaling.

Although our cohort is small, effect size calculation showed a large effect (2.168 for *grp78* and 2.035 for *tlr4*). Our data suggest that sepsis prognosis upon admission may be inferred if on the first day of hospitalization at least three blood samples are collected so to early establish the amplitude, decay constants and phase shifts of *tlr4* and *grp78* mRNA accumulation in patients' peripheral whole blood. In our dataset, higher levels of *grp78* and lower levels of *tlr4* mRNA anticipated a positive evolution of sepsis, leading to patient survival. In a follow-up one year after samples were collected, none of the discharged patients presented any morbidity related to sepsis. In contrast, intense accumulation of *tlr4* transcripts accompanied by very low (if any) levels of *grp78* mRNA in the first two days after sepsis onset reflected a poor prognosis. All deceased patients died within a period of 28 days upon ICU admission. It is an intriguing idea that some crucial genes should be kept under tight transcriptional control if the organism is to survive. Besides being a useful marker of homeostasis breakage, the lost of transcriptional control might, *per se*, be a driving force behind the pathological state. If confirmed, new venues of research shall open, aiming at understanding and preserving transcriptional control during intense inflammatory conditions such as sepsis. We envision that model refining through multicentric collection of additional *in vitro* data will shed more light on the mechanisms regulating gene transcription

during intense systemic inflammatory conditions, and will provide the intensive care personnel an additional compass to guide subsequent therapy.

## **Material and Methods**

### **Patient recruitment**

The study involved consecutive data collection from clinical and surgical patients, aged over 18 years old, referred to the ICU of the University Hospital at the University of São Paulo, and diagnosed with sepsis according to Acute Physiology and Chronic Health Evaluation II (APACHE) and SOFA within the first 24 hours of admission. During the ICU stay, all patients received medical treatment according to accepted guidelines [38].

Peripheral blood samples as well as clinical and laboratorial data were collected at patient admission to the ICU within the first 24 hours of sepsis onset and every 24 hours up to five days. The total length of the hospital stay and outcome were recorded. Treatment with corticosteroids and/or antibiotics in the days previous to admission to the ICU was an exclusion criterion for recruitment. Additional information was also collected, including comorbidities, smoking and alcoholism history. The Institutional Research Ethics Committees (CEP-HU/USP 940/09 SISNEP CAAE 0048.0.019.198-09, CEPISH-ICB 975/10) approved of the study and patients signed a written informed consent prior to enrollment in the study.

### **Laboratorial investigations**

Sites of suspected or documented infection, serum levels of C-reactive protein, total bilirubin and fractions, blood gas analysis, complete blood count, and levels of creatinine, urea, sodium,

potassium, lactate, and glucose were documented (Table 2). Subsequent daily measurements of these parameters were performed and are available upon request.

**Table 2** Clinical and laboratory data of sepsis patients

| Patient #                          | 1                    | 2                                          | 3                                   | 4                              | 5                                   | 6                                          | 7                                     | 8                              | 9                         | 10                                   |
|------------------------------------|----------------------|--------------------------------------------|-------------------------------------|--------------------------------|-------------------------------------|--------------------------------------------|---------------------------------------|--------------------------------|---------------------------|--------------------------------------|
| Gender                             | F                    | M                                          | F                                   | F                              | M                                   | F                                          | M                                     | M                              | M                         | F                                    |
| Age                                | 32                   | 79                                         | 32                                  | 89                             | 48                                  | 80                                         | 43                                    | 19                             | 26                        | 81                                   |
| Infection focus                    | uterus post-abortion | broncho pneumonia                          | small bowel colitis, peritonitis    | colecistitis                   | peritonitis                         | hip prothetic infection, broncho pneumonia | kidney                                | pericardium and skin abscesses | pleural cavity, pneumonia | septicemia, pneumonia                |
| Bacterial culture                  | N                    | <i>C. albicans</i> + <i>S. maltophilia</i> | <i>S. pyogenes</i> + <i>E. coli</i> | <i>E. coli</i>                 | <i>E. coli</i> + fecal Enterococcus | <i>E. coli</i>                             | <i>S. pyogenes</i>                    | <i>S. aureus</i>               | ND                        | <i>S. aureus</i> + <i>S. hominis</i> |
| Comorbidities                      | N                    | N                                          | N                                   | Hypertension, previous strokes | N                                   | N                                          | Appendectomy, one month before sepsis | N                              | N                         | N                                    |
| C-reactive protein - ICU admission | 179                  | 123                                        | 251                                 | 172                            | 499                                 | 238                                        | 61                                    | 49                             | 221                       | 181                                  |
| Leucocytes - ICU admission         | 23,400               | 13,800                                     | 9,800                               | 3,900                          | 2,600                               | 20,200                                     | 11,200                                | 9,500                          | ND                        | 11,700                               |
| Neutrophils - ICU admission        | 0                    | 0                                          | 1,000                               | 1,000                          | 1,000                               | 6,000                                      | 5,000                                 | 1,000                          | ND                        | ND                                   |
| Lactate - ICU admission            | 15.9                 | 48.1                                       | 8.3                                 | 26.2                           | 20.6                                | 12.9                                       | 37.4                                  | 46.9                           | 46.9                      | 28.1                                 |

|                                |          |                             |                                                |          |          |       |                                       |          |          |                                                      |
|--------------------------------|----------|-----------------------------|------------------------------------------------|----------|----------|-------|---------------------------------------|----------|----------|------------------------------------------------------|
| Causa mortis – autopsy results | NA       | sepsis and bronchopneumonia | sepsis shock refractory to hemodynamic support | NA       | NA       | ND    | septic shock, multiple organs failure | NA       | NA       | septic shock, bronchopneumonia, acute kidney failure |
| Outcome                        | Survival | Death                       | Death                                          | Survival | Survival | Death | Death                                 | Survival | Survival | Death                                                |

N = pathology absent or absence of bacterial growth *in vitro*. Values in mg/dL units. BD = below detection. ND = not done. NA = not applicable. Normal ranges: C-Reactive Protein (CRP) < 1mg/L, Leucocytes 4,000 - 10,000 cells/mm<sup>3</sup>, Neutrophils 1,800 - 7,500 cells/mm<sup>3</sup>, Lactate < 20mg/dL.

## Transcripts quantification

Two and a half ml of peripheral blood were collected into PAXgene RNA tubes (PreAnalytiX BD) every 24 hours from time of admission (unless stated otherwise), up to five days (or less, in those cases where the patient died or was discharged). Tubes were kept at -20°C for up to 4 months until RNA isolation. Total RNA was isolated using PAXgene Blood RNA kits (Qiagen, São Paulo, Brazil), and synthesis of cDNA was performed in the presence of RNase inhibitor using random primers and the High Capacity cDNA Reverse Transcription kit (Thermo Fisher Scientific, São Paulo, Brazil), according to the manufacturer's instructions. Real-time quantitative PCR (qPCR) were performed using specific primers and Fast SYBR® Green Master Mix (Thermo Fisher Scientific, São Paulo, Brazil) in an Agilent Mx3005P qPCR System (Agilent Technologies, Santa Clara, CA, USA). Triplicate reactions were run for each sample. Oligonucleotides used for transcripts quantification: GRP78/BiP forward (NM\_005347.4, exon 1) 5'-CGAGGAGGAGGACAAGAAGG, GRP78/BiP reverse (NM\_005347.4, exon 3) 5'-CACCTTGAACGGCAAGAAGT, GAPDH forward (NM\_001289746.1, exon 7) 5'-CGACCACTTTGTCAAGCTCA, GAPDH reverse (NM\_001289746.1, exon 8) 5'-

CTGTGAGGAGGGGAGATTCA, TLR4 forward (NM\_138557.2, exon 1) 5'-  
CGCTTTCACCTTCCTCTCACC, TLR4 reverse (NM\_138557.2, exon 1-2) 5'-  
ATTAGGAACCACCTCCACGC. Cycling conditions were: 95°C for 20 secs, followed by 40  
cycles of 95°C for 3 seconds and 60°C for 30 seconds. Melting curves were acquired at 95°C.  
Reaction efficiencies ranged between 95 and 97%. Transcripts levels were normalized to *gapdh*  
mRNA and the mean relative abundance values were calculated using the 2- $\Delta\Delta C_t$  method [39],  
and are shown in Table 3.

**Table 3** qPCR data from sepsis patients

| Patient #                  | 1                        | 2                           | 3                        | 4                           | 5                         | 6                        | 7                        | 8                        | 9                        | 10                        |
|----------------------------|--------------------------|-----------------------------|--------------------------|-----------------------------|---------------------------|--------------------------|--------------------------|--------------------------|--------------------------|---------------------------|
| Day 0<br>TLR4<br>(GRP78)   | 1.0<br>(1.0)<br>[10 AM]  | 1.0<br>(1.0)<br>[11.25 AM]  | 1.0<br>(1.0)<br>[11 AM]  | 1.0<br>(1.0)<br>[11.30 AM]  | 1.0<br>(1.0)<br>[10 AM]   | 1.0<br>(1.0)<br>[4 PM]   | 1.0<br>(1.0)<br>[10 AM]  | 1.0<br>(1.0)<br>[12 AM]  | 1.0<br>(1.0)<br>[4 AM]   | 1.0<br>(1.0)<br>[11 PM]   |
| Day 0.5<br>TLR4<br>(GRP78) |                          |                             |                          | 0.6<br>(0.64)<br>[11.30 PM] |                           | 1.97<br>(1.7)<br>[4 AM]  | 4.3<br>(0.66)<br>[10 PM] | 0.56<br>(3.6)<br>[12 PM] | 1.97<br>(0.57)<br>[4 PM] |                           |
| Day 1<br>TLR4<br>(GRP78)   | 0.3<br>(1.23)<br>[10 AM] | 0.2<br>(0.14)<br>[11.30 AM] | 2.5<br>(1.7)<br>[11 AM]  | 0.13<br>(1.5)<br>[11.30 AM] | 0.89<br>(1.05)<br>[10 AM] | 1.7<br>(1.6)<br>[4 AM]   |                          | 1.4<br>(3.07)<br>[12 AM] | 1.71<br>(0.5)<br>[4 PM]  | 1.63<br>(1.18)<br>[11 AM] |
| Day 2<br>TLR4<br>(GRP78)   | 0.4<br>(2.0)<br>[10 AM]  | 1.3<br>(0.74)<br>[11.30 PM] | 1.5<br>(1.4)<br>[11 AM]  | 0.11<br>(0.9)<br>[11.30 AM] |                           |                          |                          | 1.01<br>(2.8)<br>[10 AM] | 1.0<br>(0.44)<br>[4 PM]  | 1.43<br>(0.8)<br>[1 PM]   |
| Day 3<br>TLR4<br>(GRP78)   | 0.7<br>(1.24)<br>[2 PM]  |                             | 0.63<br>(1.4)<br>[11 AM] | 0.25<br>(0.28)<br>[11 AM]   |                           | 0.98<br>(3.4)<br>[4 AM]  |                          | 1.7<br>(4.0)<br>[10 AM]  | 0.45<br>(0.45)<br>[4 PM] |                           |
| Day 4<br>TLR4<br>(GRP78)   | 1.0<br>(0.88)<br>[10 AM] |                             | 0.9<br>(16.4)<br>[11 AM] |                             |                           | 0.45<br>(0.4)<br>[4 AM]  |                          | 1.6<br>(4.0)<br>[10 AM]  | 0.44<br>(0.64)<br>[4 PM] |                           |
| Day 5<br>TLR4<br>(GRP78)   |                          |                             |                          |                             |                           | 0.44<br>(0.51)<br>[4 AM] |                          |                          |                          |                           |

| Outcome | Survival | Death | Death | Survival | Survival | Death | Death | Survival | Survival | Death |
|---------|----------|-------|-------|----------|----------|-------|-------|----------|----------|-------|
|---------|----------|-------|-------|----------|----------|-------|-------|----------|----------|-------|

Day 0 refers to admission to ICU and diagnosis of sepsis. Subsequent sampling was performed every 12 (“day 0.5”) or 24 hours. Times of sampling are indicated in brackets. qPCR values expressed as arbitrary units, *tlr4* in the first line, *grp78* within round parentheses.

## Data analysis

*tlr4* and *grp78* mRNA data was averaged with Origin 9.1 (OriginLab, Northampton, MA, USA), using a linear interpolation algorithm. The resulting averaged curves were fitted to a damped sine wave equation by manually varying the fitting parameters until  $0.9 < R^2 < 1$ . Data for *grp78* mRNA from patients who succumbed were fitted to the first 48 hours only.

## Statistical analyses

Data was tested for normality at 5% decision level using the Kolmogorov-Smirnov normality test. Comparisons among treatment groups were performed using Fisher’s exact test for pair-wise correlations between the averaged values of the discharged and the deceased patient groups, within either category of gene transcripts, yielding p-values of 0.001 (*tlr4*) and 0.004 (*grp78*). Between the deceased and the discharged groups, power was 0.75 (*tlr4*) and 0.81 (*grp78*), at 95% confidence level, with  $\alpha = 0.05$ . Power calculation was not performed due to lack of previous data on mRNA expression of *tlr4* and *grp78* over time *in vivo*. Effect size was calculated using Cohen’s d equation, survivors vs. deceased, yielding values of 2.035 (*tlr4*) and 2.168 (*grp78*).

## Acknowledgements

We thank Drs. Lisl Shoda, Giorgio Trinchieri and Grégoire Altan-Bonnet for the critical reading of this manuscript.

# Competing interests

No conflicts of interest, financial or otherwise, are declared by the authors.

# Funding

CNPq (400662/2014-0 for R.C.S. and 309041/2012-0 for M.M.D.C.), FAPESP (2012/04244-3 for C.P.B., 2008/54811-1 and 11/51778-6 for M.M.D.C.).

# References

1. Singer M, Deutschman CS, Seymour CW. The Third International Consensus Definitions for Sepsis and Septic Shock (Sepsis-3). *JAMA*. 2016;315:801-810.
2. Vincent JL, Marshall JC, Namendys-Silva SA, François B, Martin-Loeches I, Lipman J, Reinhart K, Antonelli M, Pickkers P, Njimi H, Jimenez E, Sakr Y. ICON Investigators. Assessment of the worldwide burden of critical illness: the Intensive Care Over Nations (ICON) audit. *Lancet Respir Med*. 2014;2:380-386.
3. Medzhitov R, Preston-Hurlburt P, Janeway CA. A human homologue of the *Drosophila* Toll protein signals activation of adaptive immunity. *Nature*. 1997;388:394-397.
4. Poltorak A, He X, Smirnova I, Liu MY, Van Huffel C, Du X, Birdwell D, Alejos E, Silva M, Galanos C, Freudenberg M, Ricciardi-Castagnoli P, Layton B, Beutler B. Defective LPS signaling in C3H/HeJ and C57BL/10ScCr mice: mutations in *Tlr4* gene. *Science*. 1998;282:2085-2088.
5. Fitzgerald KA, Rowe DC, Golenbock DT. Endotoxin recognition and signal transduction by the TLR4/MD2-complex. *Microbes Infect*. 2004; 6:1361-1367.
6. Woo CW, Cui D, Arellano J, Dorweiler B, Harding H, Fitzgerald KA, Ron D, Tabas I. Adaptive suppression of the ATF4-CHOP branch of the unfolded protein response by toll-like receptor signalling. *Nat Cell Biol*. 2009;11:1473-1480.
7. Ayala A, Perl M, Venet F, Lomas-Neira J, Swan R, Chung CS. Apoptosis in sepsis: mechanisms, clinical impact and potential therapeutic targets. *Curr Pharm Des*. 2008;14:1853-1859.
8. Hendershot LM. The ER function BiP is a master regulator of ER function. *Mt Sinai J Med*. 2004;71:289-297.
9. Ma T, Han L, Gao Y, Li L, Shang X, Hu W, Xue C. The endoplasmic reticulum stress-mediated apoptosis signal pathway is involved in sepsis-induced abnormal lymphocyte apoptosis. *Eur Surg Res*. 2008;41:219-225.
10. Endo M, Mori M, Akira S, Gotoh T. C/EBP homologous protein (CHOP) is crucial for the induction of caspase-11 and the pathogenesis of lipopolysaccharide-induced inflammation. *J Immunol*. 2006;176:6245-6253.
11. Khan MM, Yang WL, Wang P. Endoplasmic reticulum in stress in sepsis. *Shock*. 2015;44:294-304.

12. Kim HJ, Jeong JS, Kim SR, Park SY, Chae HJ, Lee YC. Inhibition of endoplasmic reticulum stress alleviates lipopolysaccharide-induced lung inflammation through modulation of NF- $\kappa$ B/HIF-1 $\alpha$  signaling pathway. *Sci Rep*. 2013;3:1142.
13. Pierrakos C, Vincent JL. Sepsis biomarkers: a review. *Crit Care*. 2010;14:1-18 .
14. Daviaud F, Grimaldi D, Dechartres A, Charpentier J, Geri G, Marin N, Chiche JD, Cariou A, Mira JP, Pène F. Timing and causes of death in septic shock. *Ann Intensive Care*. 2015;5:16.
15. Lolis E, Bucala R. Therapeutic approaches to innate immunity: severe sepsis and septic shock. *Nat Rev Drug Discov*. 2003;2:635-645.
16. Tsujimoto H, Ono S, Efron PA, Scumpia PO, Moldawer LL, Mochizuki H. Role of Toll-like receptors in the development of sepsis. *Shock*. 2008;29:315-321.
17. Silver AC, Arjona A, Walker WE, Fikrig E. The circadian clock controls toll-like receptor 9-mediated innate and adaptive immunity. *Immunity*. 2012;36: 251-261.
18. Bosisio D, Polentarutti N, Sironi M, Bernasconi S, Miyake K, Webb GR, Martin MU, Mantovani A, Muzio M. Stimulation of toll-like receptor 4 expression in human mononuclear phagocytes by interferon-gamma: a molecular basis for priming and synergism with bacterial lipopolysaccharide. *Blood*. 2002; 99:3427-3431.
19. Asea A, Rehli M, Kabingu E, Boch JA, Bare O, Auron PE, Stevenson MA, Calderwood SK. (2002) Novel signal transduction pathway utilized by extracellular HSP70: role of toll-like receptor (TLR) 2 and TLR4. *J Biol Chem*. 2002;277:15028-15034.
20. Aneja R, Odoms K, Dunsmore K, Shanley TP, Wong HR. Extracellular heat shock protein-70 induces endotoxin tolerance in THP-1 cells. *J Immunol*. 2006;177:7184-7192.
21. Gelain DP, de Bittencourt Pasquali MA, M Comim C, Grunwald MS, Ritter C, Tomasi CD, Alves SC, Quevedo J, Dal-Pizzol F, Moreira JC. Serum heat shock protein 70 levels, oxidant status, and mortality in sepsis. *Shock*. 2011; 35:466-470.
22. Delpino A, Castelli M. The 78 kDa glucose-regulated protein (GRP78/BIP) is expressed on the cell membrane, is released into cell culture medium and is also present in human peripheral circulation. *Biosci Rep*. 2002; 22:407-420.
23. Basu S, Binder RJ, Suto R, Anderson KM, Srivastava PK. Necrotic but not apoptotic cell death releases heat shock proteins, which deliver a partial maturation signal to dendritic cells and activate the NF- $\kappa$ B pathway. *Int Immunol*. 2000;12:1539-1546.
24. Birukova AA, Singleton PA, Gawlak G, Tian X, Mirzapoiazova T, Mambetsariev B, Dubrovskiy O, Oskolkova OV, Bochkov VN, Birukov KG. GRP78 is a novel receptor initiating a vascular barrier protective response to oxidized phospholipids. *Mol Biol Cell*. 2014;25:2006-2016.
25. Oskolkova OV, Afonyushkin T, Preinerstorfer B, Bicker W, von Schlieffen E, Hainzl E, Demyanets S, Schabbauer G, Lindner W, Tselepis AD, Wojta J, Binder BR, Bochkov VN. Oxidized phospholipids are more potent antagonists of lipopolysaccharide than inducers of inflammation. *J Immunol*. 2010;185:7706-7712.
26. Afrazi A, Sodhi CP, Good M, Jia H, Siggers R, Yazji I, Ma C, Neal MD, Prindle T, Grant ZS, Branca MF, Ozolek J, Chang EB, Hackam DJ. Intracellular heat shock protein-70 negatively regulates TLR4 signaling in the newborn intestinal epithelium. *J Immunol*. 2012;188:4543-4557.
27. Keller M, Mazuch J, Abraham U, Eom GD, Herzog ED, Volk HD, Kramer A, Maier B. A circadian clock in macrophages controls inflammatory immune responses. *Proc Natl Acad Sci USA*. 2009;106:21407-21412.



28. Cheng ZG, Zhang Z, Ghassemi M, Silva I, Ainslie P, Celi LA. Modeling Circadian Rhythm Variations During Sepsis. *Am J Respir Crit Care Med*. 2014; 189, A3795.
29. Hasnain SZ, Tauro S, Das I, Tong H, Chen AC, Jeffery PL, McDonald V, Florin TH, McGuckin MA. IL-10 promotes production of intestinal mucus by suppressing protein misfolding and endoplasmic reticulum stress in goblet cells. *Gastroenterology*. 2013;144:357-368.
30. Bagchi AK, Sharma A, Akolkar G, Singal PK. Crosstalk between Toll-like Receptor 4 and Interleukin 10 in Cardiomyocyte Survival. *Faseb J*. 2013;27:1.
31. Ledebroer A, Brevé JJ, Wierinckx A, van der Jagt S, Bristow AF, Leysen JE, Tilders FJ, Van Dam AM. Expression and regulation of interleukin-10 and interleukin-10 receptor in rat astroglial and microglial cells. *Eur J Neurosci*. 2002;16:1175-85.
32. Donnelly RP, Freeman SL, Hayes MP. Inhibition of IL-10 expression by IFN-gamma up-regulates transcription of TNF-alpha in human monocytes. *J Immunol*. 1995;155:1420-1427.
33. Kitamura Y, Taniguchi T, Kimura H, Nomura Y, Gebicke-Haerter PJ. Interleukin-4-inhibited mRNA expression in mixed rat glial and in isolated microglial cultures. *J Neuroimmunol*. 2000;106: 95-104.
34. McCoy CE, Sheedy FJ, Qualls JE, Doyle SL, Quinn SR, Murray PJ et al. IL-10 inhibits miR-155 induction by Toll-like receptors. *J Biol Chem*. 2010;285: 20492–8.
35. Iyer SS, Cheng G. Role of Interleukin 10 Transcriptional Regulation in Inflammation and Autoimmune Disease. *Crit Rev Immunol*. 2012;32:23-63.
36. Sinnaeve PR, Donahue MP, Grass P, Seo D, Vonderscher J, Chibout S-D, Kraus WE, Sketch MJ, Nelson C, Ginsburg GS, Goldschmidt-Clermont PJ, Granger CB. Gene Expression Patterns in Peripheral Blood Correlate with the Extent of Coronary Artery Disease. *PLOS One*. 2009;4:e7037.
37. Brea D, Sobrino T, Rodríguez-Yáñez M, Ramos-Cabrera P, Agulla J, Rodríguez-González R, Campos F, Blanco M, Castillo J. Toll-like receptors 7 and 8 expression is associated with poor outcome and greater inflammatory response in acute ischemic stroke. *Clin Immun*. 2011;139:193-198.
38. Dellinger RP, et al. Surviving Sepsis Campaign: international guidelines for management of severe sepsis and septic shock. *Crit Care Med* . 2013;41:580-637.
39. Livak KJ, Schmittgen TD. Analysis of relative gene expression data using real-time quantitative PCR and the 2(-Delta Delta C(T)) Method. *Methods*. 2001;25:402-408.
